# Supplementary material for: Patents on Endophytic Fungi for Agriculture and Bio- and Phytoremediation Applications
Source: PubMed Central journal article supplement (PMC7465599; doi:10.3390/microorganisms8081237), 2020-08-14
Supplement: microorganisms-08-01237-s001.pdf [file microorganisms-08-01237-s001.pdf]

# Patents on endophytic fungi for agriculture and bio-and phytoremediation applications

Humberto E. Ortega, Daniel Torres-Mendoza and Luis Cubilla-Rios

| Table S1. List of patents grounded in the use of several endophytic fungi to develop applications |                                                                                                                                                                                                                                                                                                                                                                                                                                                                                                                                                                                                                                                                                                                                           |
|---------------------------------------------------------------------------------------------------|-------------------------------------------------------------------------------------------------------------------------------------------------------------------------------------------------------------------------------------------------------------------------------------------------------------------------------------------------------------------------------------------------------------------------------------------------------------------------------------------------------------------------------------------------------------------------------------------------------------------------------------------------------------------------------------------------------------------------------------------|
| Patent No.                                                                                        | Endophytic fungi                                                                                                                                                                                                                                                                                                                                                                                                                                                                                                                                                                                                                                                                                                                          |
| US20150366217A1                                                                                   | <i>Paraconiothyrium</i> sp., <i>Pseudeurotium</i> sp., <i>Penicillium</i> sp., <i>Cladosporium</i> sp., <i>Acremonium</i> sp., <i>Alternaria</i> sp., <i>Aspergillus</i> sp., <i>Aureobasidium</i> sp., <i>Biscogniauxia</i> sp., <i>Botryosphaeria</i> sp., <i>Botrytis</i> sp., <i>Bullera</i> sp., <i>Cercospora</i> sp., <i>Chaetothriales</i> , <i>Cladosporium</i> sp., <i>Cochliobolus</i> sp., <i>Coniothyrium</i> sp., <i>Cryptococcus</i> spp., <i>Davidiella</i> sp., <i>Dioszegia</i> sp., <i>Dothideales</i> , <i>Dothideomycetes</i> , <i>Epicoccum</i> sp., <i>Erysiphe</i> sp., <i>Erythrobasidium</i> sp., <i>Fusarium</i> sp., <i>Gibberella</i> sp., <i>Hannaella</i> sp., <i>Hormonema</i> sp., <i>Hypoxyton</i> sp., |
| WO2016179047A1                                                                                    | <i>Lecythophora</i> sp., <i>Leptospora</i> sp., <i>Lewia</i> sp., <i>Monodictys</i> sp., <i>Monographella</i> sp., <i>Mucor</i> sp., <i>Nectria</i> sp., <i>Neurospora</i> sp., <i>Paraconiothyrium</i> sp., <i>Parastagonospora</i> sp., <i>Penicillium</i> sp., <i>Periconia</i> sp., <i>Pestalotiopsis</i> sp., <i>Phaeomoniella</i> sp., <i>Phoma</i> sp., <i>Phyllosticta</i> sp., <i>Pichia</i> sp., <i>Pleosporales</i> , <i>Preussia</i> sp., <i>Rhizopus</i> sp., <i>Rhodosporeidium</i> sp., <i>Sordariomycetes</i> , <i>Sporobolomyces</i> , <i>Sporormiaceae</i> , <i>Stagonospora</i> sp., <i>Udeniomyces</i> , <i>Wallemia</i> sp., <i>Xylaria</i> sp.                                                                      |
| CZ306950B6                                                                                        | <i>Verticillium leptobactrum</i> , <i>Exophiala</i> sp., <i>Halenospora</i> sp., <i>Zalerion</i> sp.                                                                                                                                                                                                                                                                                                                                                                                                                                                                                                                                                                                                                                      |
| US20150373993A1                                                                                   | <i>Acremonium</i> sp., <i>Alternaria</i> sp., <i>Cladosporium</i> sp., <i>Cochliobolus</i> sp., <i>Embelisia</i> sp., <i>Epicoccum</i> sp., <i>Fusarium</i> sp., <i>Nigrospora</i> sp., <i>Phoma</i> sp., <i>Podospora</i> sp., <i>Curvularia</i> sp., <i>Epicoccum</i> sp., <i>Periconia</i> sp., <i>Acremonium</i> sp., <i>Cladosporium</i> sp.,                                                                                                                                                                                                                                                                                                                                                                                        |
| WO2018102733A1                                                                                    | <i>Exserohilum</i> sp., <i>Paraconiothyrium</i> sp., <i>Penicillium</i> sp., <i>Pseudeurotium</i> sp., <i>Phialemonium</i> sp.                                                                                                                                                                                                                                                                                                                                                                                                                                                                                                                                                                                                            |
| WO2018119419A1                                                                                    | <i>Cladosporium</i> sp., <i>Sphaerulina</i> sp., <i>Epicoccum</i> sp., <i>Stagonospora</i> sp., <i>Alternaria</i> sp., <i>Bipolaris</i> sp., <i>Stemphylium</i> sp., <i>Preussia</i> sp., <i>Curvularia</i> sp., <i>Penicillium</i> sp., <i>Phomopsis</i> sp., <i>Gibellulopsis</i> sp., <i>Acremonium</i> sp., <i>Fusarium</i> sp., <i>Purpureocillium</i> sp., <i>Chaetomium</i> sp., <i>Cryptococcus</i> sp.                                                                                                                                                                                                                                                                                                                           |
| CN107900098A                                                                                      | <i>Alternaria</i> sp., <i>Cunninghamella</i> sp., <i>Penicillium</i> sp., <i>Phoma</i> sp., <i>Fusarium</i> sp., <i>Gilmaniella</i> sp., <i>Sclerotium</i> sp., <i>Acremonium</i> sp., <i>Ceratobasidium stevensii</i> , <i>Rhizoctonia</i> spp., <i>Pestalotiopsis</i> spp., <i>Acremoniella</i> spp., <i>Chaetomium</i> spp., <i>Coniothyrium</i> spp., <i>Coryneum</i> spp., <i>Dothiorella</i> spp., <i>Phomopsis</i> sp.                                                                                                                                                                                                                                                                                                             |
| WO2019115582A1                                                                                    | <i>Alternaria alternata</i> , <i>Penicillium brevicompactum</i> , <i>Penicillium glabrum</i> , <i>Cladosporium ramontenellum</i> , <i>Cladosporium herbarum</i> , <i>Humicola grisea</i> , <i>Talaromyces purpurogenus</i>                                                                                                                                                                                                                                                                                                                                                                                                                                                                                                                |
| WO2016030535A1                                                                                    | <i>Paecilomyces marquandii</i> , <i>Viridispora alata</i> , <i>Cladosporium</i> sp., <i>Penicillium brevicompactum</i> , <i>Pyronochaeta unguis-hominis</i> , uncultured <i>Metarhizium</i> , uncultured fungus FJ820798, <i>Exophiala oligosperma</i>                                                                                                                                                                                                                                                                                                                                                                                                                                                                                    |
